# Supplementary material for: A Metagenomics Pipeline to Characterize Self-Collected Vaginal Microbiome Samples
Source: Preprints.org preprint supplement (doi:10.20944/preprints202405.1036.v2), 2024-08-14
Supplement: Supplementary file 1 [file supplementary]

## Sheet: Sup Table 1
InputSpecies	StrainID	InDatabase	TopHitSpecies	Host Depleted Reads	Top Hit Relative Abundance	Top Hit Percent Identity	>50% rel abund AND >90% ID	Species ID match	Species level
Lancefieldella_parvulum	33793_2	in database	Lancefieldella_parvulum	409674	0.986455	0.894261	FAIL	TRUE	False Negative
Candida_albicans	14053_1	in database	Candida_albicans	30740	0.421934	0.979986	FAIL	TRUE	False Negative
Escherichia_coli	BAA371_S177	in database	Serratia_liquefaciens	1640678	0.46885	0.868122	FAIL	FALSE	False Negative
Proteus_vulgaris	33420_S170	in database	Proteus_penneri	1042268	0.431537	0.918859	FAIL	FALSE	False Negative
Proteus_vulgaris	49132_S171	in database	Proteus_penneri	779592	0.364913	0.919269	FAIL	FALSE	False Negative
Salmonella_enterica	29630-655537_S308.species	in database	Priestia_megaterium	690160	0.969027	0.892298	FAIL	FALSE	False Negative
Streptococcus_mitis	15914_S145	in database	Streptococcus_oralis	638320	0.460166	0.927697	FAIL	FALSE	False Negative
Actinomyces_oris	15988_S7	in database	Actinomyces_naeslundii	496578	0.686655	0.960179	PASS	FALSE	False Positive
Enterococcus_avium	49465_S62	not in database	Enterococcus_faecium	158586	0.520716	0.930859	PASS	FALSE	False Positive
Enterobacter_cloacae	35030_S58	in database	Enterobacter_hormaechei	2085822	0.981234	0.963787	PASS	FALSE	False Positive
Enterobacter_cloacae	BAA3044_S59	in database	Enterobacter_hormaechei	1975982	0.878494	0.962433	PASS	FALSE	False Positive
Mycobacterium_tuberculosis	526180_S166.species	not in database	Lactobacillus_crispatus	7888932	0.523962	0.956421	PASS	FALSE	False Positive
Shigell flexneri	12022_S165	not in database	Escherichia_coli	726090	0.729814	0.969284	PASS	FALSE	False Positive
Streptococcus_gallolyticus	49147_1	not in database	Streptococcus_macedonicus	123124	0.954036	0.899661	PASS	FALSE	False Positive
Streptococcus_gallolyticus	9809_S141	not in database	Streptococcus_macedonicus	613496	0.941493	0.901316	PASS	FALSE	False Positive
Streptococcus_mitis	49456_1	in database	Streptococcus_oralis	424636	0.657084	0.941588	PASS	FALSE	False Positive
Streptococcus_mutans	700610_S173	not in database	Enterococcus_faecium	878110	0.973918	0.948482	PASS	FALSE	False Positive
Trichomonas vaginalis	30235_S153	not in database	Cutibacterium_acnes	783578	0.953257	0.906817	PASS	FALSE	False Positive
Acinetobacter baylyi	33305_1	not in database	Acinetobacter_ursingii	476328	0.291391	0.796911	FAIL	FALSE	True Negative
Aspergillus fumigatus	204305_S12	not in database	Aspergillus_flavus	155772	0.161315	0.781209	FAIL	FALSE	True Negative
Aspergillus fumigatus	16424_S13	not in database	Aspergillus_flavus	1545232	0.206515	0.729543	FAIL	FALSE	True Negative
human_adenovirus	49626D-5_S160	not in database	Lancefieldella_parvulum	1220546	0.663979	0.785905	FAIL	FALSE	True Negative
Bacillus_paranthracis	13016_2	not in database	Proteus_mirabilis	111642	0.120631	0.979666	FAIL	FALSE	True Negative
Bacillus_paranthracis	13061_S20	not in database	Priestia_megaterium	1601406	0.136548	0.701193	FAIL	FALSE	True Negative
Bacteroides_fragilis	2_29762	not in database	Enterobacter_hormaechei	386704	0.117293	0.958344	FAIL	FALSE	True Negative
Bacteroides_ovatus	BAA-1296_S162	not in database	Prevotella_bivia	787318	0.137925	0.901332	FAIL	FALSE	True Negative
Bacteroides_vulgatus	8482_S161	not in database	Lactobacillus_iners	709094	0.148016	0.964504	FAIL	FALSE	True Negative
Betacoronavirus	VR-1558D_S24	not in database	Gardnerella_vaginalis	117084	0.190513	0.830336	FAIL	FALSE	True Negative
Campylobacter_coli	33559_S28	not in database	Campylobacter_jejuni	735142	0.980817	0.875727	FAIL	FALSE	True Negative
Clostridioides_difficile	9689_S45	not in database	Peptostreptococcus_anaerobius	881380	0.106776	0.70215	FAIL	FALSE	True Negative
Clostridium_haemolyticum	9650_S46	not in database	Clostridium_massiliodielmoense	35792	0.803832	0.867547	FAIL	FALSE	True Negative
Corynebacterium_jeikeium	43734_S51	not in database	Corynebacterium_urealyticum	1118702	0.347652	0.874831	FAIL	FALSE	True Negative
C_lari	BAA-1060D-5_S29	not in database	Campylobacter_jejuni	1130422	0.837008	0.752635	FAIL	FALSE	True Negative
Clostridium_sordellii	9714_S48	not in database	Clostridium_perfringens	1059914	0.14472	0.642388	FAIL	FALSE	True Negative
Clostridium_tetani	19406_2	not in database	Clostridium_massiliodielmoense	102222	0.32717	0.733478	FAIL	FALSE	True Negative
Chlamydia_trachomatis	123-VR_S41	not in database	Limosilactobacillus_reuteri	1976948	0.099973	0.972119	FAIL	FALSE	True Negative
Chlamydia_trachomatis	VR-348B_S40	not in database	Corynebacterium_striatum	1434808	0.0915156	0.973362	FAIL	FALSE	True Negative
Chlamydia_trachomatis	VR347_S39	not in database	Corynebacterium_striatum	269620	0.0713647	0.972103	FAIL	FALSE	True Negative
Capnocytophaga_haemolytica	51501_S47	not in database	Listeria_monocytogenes	692796	0.100309	0.9541	FAIL	FALSE	True Negative
Campylobacter_lari	BAA1060D5-655527_S298.species	not in database	Campylobacter_jejuni	16381558	0.81383	0.753782	FAIL	FALSE	True Negative
Enterococcus_avium	49464_S63	not in database	Enterococcus_faecium	397470	0.479385	0.911524	FAIL	FALSE	True Negative
Enterococcus_gallinarum	49608_S70	not in database	Enterococcus_faecium	1262066	0.476092	0.90128	FAIL	FALSE	True Negative
Enterococcus_gallinarum	700425_S71	not in database	Enterococcus_faecium	350852	0.471346	0.907758	FAIL	FALSE	True Negative
Faecalibacterium_prausnitzii	27768_S164	not in database	Gardnerella_vaginalis	36402	0.210688	0.977764	FAIL	FALSE	True Negative
Helicobacter_pylori	BAA945_S76	not in database	Campylobacter_jejuni	1158112	0.168651	0.67087	FAIL	FALSE	True Negative
Haemophilus_ducreyi	51566_S164.species	not in database	Pasteurella_bettyae	1384498	0.248715	0.729042	FAIL	FALSE	True Negative
Haemophilus_ducreyi	51568_S163.species	not in database	Pasteurella_bettyae	3807124	0.277625	0.728671	FAIL	FALSE	True Negative
Haemophilus_ducreyi	700724_S170.species	not in database	Pasteurella_bettyae	3268518	0.277898	0.722225	FAIL	FALSE	True Negative
Herpesvirus	VR-539D_S77	not in database	Enterococcus_faecium	48704	0.205789	0.966393	FAIL	FALSE	True Negative
Moraxella_bovis	10900_S97	not in database	Acinetobacter_baumannii	87676	0.240062	0.973422	FAIL	FALSE	True Negative
Mycoplasma_genitalium	49895_S101	not in database	Mycoplasma_imitans	86620	0.209489	0.684926	FAIL	FALSE	True Negative
Mycoplasma_genitalium	49899_S102	not in database	Mycoplasma_imitans	43440	0.177502	0.655426	FAIL	FALSE	True Negative
Mycobacterium_intracellulare	1395D_S184	not in database	Mycobacterium_parascrofulaceum	538076	0.850318	0.866011	FAIL	FALSE	True Negative
Mycobacterium_smegmatis	14468_S183	not in database	Mycolicibacterium_hassiacum	2257792	0.318112	0.914849	FAIL	FALSE	True Negative
Mycobacterium_tuberculosis	25177_S169.species	not in database	Mycobacterium_parascrofulaceum	3085420	0.380014	0.730746	FAIL	FALSE	True Negative
Mycobacterium_tuberculosis	35818_1	not in database	Mycobacterium_parascrofulaceum	4462188	0.22417	0.738073	FAIL	FALSE	True Negative
Mycobacterium_tuberculosis	55818_S165.species	not in database	Mycobacterium_parascrofulaceum	6707672	0.302167	0.72231	FAIL	FALSE	True Negative
Neisseria_gonorrhoeae	31151_S107	not in database	Streptococcus_pyogenes	782594	0.274788	0.960382	FAIL	FALSE	True Negative
Neisseria_gonorrhoeae	53422D_S106	not in database	Streptococcus_pyogenes	800272	0.241614	0.965496	FAIL	FALSE	True Negative
Parabacteroides_distasonis	BAA-1295_S167	not in database	Parabacteroides_provencensis	535944	0.31693	0.748929	FAIL	FALSE	True Negative
Proteus_hauseri	13315_S187	not in database	Proteus_penneri	43148	0.264136	0.901392	FAIL	FALSE	True Negative
Serratia_marcescens	21212_S118	not in database	Serratia_liquefaciens	1711070	0.630818	0.867401	FAIL	FALSE	True Negative
Serratia_marcescens	31062_S120	not in database	Serratia_liquefaciens	145106	0.569205	0.876756	FAIL	FALSE	True Negative
Streptococcus_mutans	25175_1	not in database	Streptococcus_macacae	473010	0.334944	0.813661	FAIL	FALSE	True Negative
Neoscytalidium dimidiatum	66112_S114	not in database	Enterococcus_faecium	31426	0.337063	0.967028	FAIL	FALSE	True Negative
Scytalidium_lignicola	52538_S188	not in database	Listeria_monocytogenes	23890	0.334975	0.984364	FAIL	FALSE	True Negative
Trichomonas vaginalis	30238_S152	not in database	Streptococcus_agalactiae	171430	0.0692671	0.968443	FAIL	FALSE	True Negative
Acinetobacter_baumannii	BAA1790_1	in database	Acinetobacter_baumannii	941966	0.86612	0.966296	PASS	TRUE	True Positives
Anaerococcus_prevotii	9321_S157	in database	Anaerococcus_prevotii	601436	0.892355	0.896413	PASS	TRUE	True Positives
Aerococcus_urinae	51268_S10	in database	Aerococcus_urinae	1121586	0.992999	0.9302	PASS	TRUE	True Positives
Aerococcus_urinae	700306_1	in database	Aerococcus_urinae	1481988	0.981072	0.937435	PASS	TRUE	True Positives
Anaerococcus_vaginalis	51170_1	in database	Anaerococcus_vaginalis	136820	0.977675	0.95226	PASS	TRUE	True Positives
Anaerococcus_vaginalis	51170_2	in database	Anaerococcus_vaginalis	303930	0.975308	0.947535	PASS	TRUE	True Positives
Atopobium_vaginae	BAA-55DQ_S17	in database	Fannyhessea_vaginae	49096	0.964221	0.96746	PASS	TRUE	True Positives
Aerococcus_viridans	10400_S11	in database	Aerococcus_viridans	1098724	1	0.907287	PASS	TRUE	True Positives
Cutibacterium_acnes	11827_S56	in database	Cutibacterium_acnes	429334	0.960273	0.906142	PASS	TRUE	True Positives
Cutibacterium_acnes	33179_S57	in database	Cutibacterium_acnes	47196	0.836204	0.908705	PASS	TRUE	True Positives
Cutibacterium_acnes	6919_S55	in database	Cutibacterium_acnes	191534	0.954993	0.908747	PASS	TRUE	True Positives
Candida_albicans	14053_3	in database	Candida_albicans	83070	0.884801	0.982635	PASS	TRUE	True Positives
Citrobacter_freundii	14135_S43	in database	Citrobacter_freundii	1645774	0.979976	0.973286	PASS	TRUE	True Positives
Citrobacter_freundii	33128_S42	in database	Citrobacter_freundii	2223096	0.985533	0.972519	PASS	TRUE	True Positives
Citrobacter_freundii	BAA-3038_S44	in database	Citrobacter_freundii	3285356	0.96206	0.971748	PASS	TRUE	True Positives
Candida_glabrata	66032_3	in database	Candida_glabrata	905372	0.970993	0.94683	PASS	TRUE	True Positives
Candida_parapsilosis	7330_S34	in database	Candida_parapsilosis	632372	0.969078	0.946635	PASS	TRUE	True Positives
Candida_parapsilosis	90018_S33	in database	Candida_parapsilosis	1013180	0.981976	0.94382	PASS	TRUE	True Positives
Corynebacterium_striatum	43735_1	in database	Corynebacterium_striatum	2405840	0.991085	0.969416	PASS	TRUE	True Positives
Corynebacterium_striatum	9016_S54	in database	Corynebacterium_striatum	2764842	0.985231	0.969944	PASS	TRUE	True Positives
Candida_tropicalis	13803_3	in database	Candida_tropicalis	109048	0.946872	0.942197	PASS	TRUE	True Positives
Enterobacter_cloacae	13047_S60	in database	Enterobacter_cloacae	195156	0.901811	0.971967	PASS	TRUE	True Positives
Escherichia_coli	23735_S75	in database	Escherichia_coli	1485708	0.714378	0.962252	PASS	TRUE	True Positives
Escherichia_coli	3047_S73	in database	Escherichia_coli	1599828	0.730833	0.963516	PASS	TRUE	True Positives
Escherichia_coli	35150_S74	in database	Escherichia_coli	2513736	0.900419	0.959893	PASS	TRUE	True Positives
Enterococcus_faecium	BAA2127_S67	in database	Enterococcus_faecium	22008	0.742441	0.957582	PASS	TRUE	True Positives
Enterococcus_faecalis	19433_S65	in database	Enterococcus_faecalis	30096	0.820811	0.974164	PASS	TRUE	True Positives
Enterococcus_faecalis	49478_S66	in database	Enterococcus_faecalis	165824	0.960972	0.972896	PASS	TRUE	True Positives
Enterococcus_faecium	BAA-2319_S68	in database	Enterococcus_faecium	569458	0.974479	0.963298	PASS	TRUE	True Positives
Enterococcus_hirae	49135_S178	in database	Enterococcus_hirae	664434	0.961775	0.906088	PASS	TRUE	True Positives
Enterococcus_hirae	49479_S72	in database	Enterococcus_hirae	1098188	0.947087	0.906478	PASS	TRUE	True Positives
Enterobacter_hormaechei	49162_S192	in database	Enterobacter_hormaechei	970092	0.946764	0.934339	PASS	TRUE	True Positives
Finegoldia_magna	15794_S163	in database	Finegoldia_magna	476362	0.981524	0.953528	PASS	TRUE	True Positives
Streptococcus_pyogenes	11434_S149	in database	Streptococcus_pyogenes	639398	0.973613	0.961506	PASS	TRUE	True Positives
Streptococcus_pyogenes	12373_S148	in database	Streptococcus_pyogenes	22562	0.91873	0.966169	PASS	TRUE	True Positives
Streptococcus_pyogenes	19615_S147	in database	Streptococcus_pyogenes	333136	0.954253	0.963471	PASS	TRUE	True Positives
Streptococcus_agalactiae	12403_S138	in database	Streptococcus_agalactiae	1405040	0.988582	0.971005	PASS	TRUE	True Positives
Streptococcus_agalactiae	70046_S137	in database	Streptococcus_agalactiae	258000	0.988075	0.973992	PASS	TRUE	True Positives
Gardnerella_vaginalis	14018_S161.species	in database	Gardnerella_vaginalis	184414	0.958071	0.975146	PASS	TRUE	True Positives
Gardnerella_vaginalis	14019_S162.species	in database	Gardnerella_vaginalis	59586	0.942298	0.975841	PASS	TRUE	True Positives
Klebsiella_aerogenes	15038_S80	in database	Klebsiella_aerogenes	2553014	0.961097	0.967887	PASS	TRUE	True Positives
Klebsiella_aerogenes	35028_S79	in database	Klebsiella_aerogenes	1585242	0.935373	0.969749	PASS	TRUE	True Positives
Klebsiella_aerogenes	51342_S78	in database	Klebsiella_aerogenes	1108112	0.944482	0.970928	PASS	TRUE	True Positives
Klebsiella_oxytoca	49131_S82	in database	Klebsiella_oxytoca	897678	0.939079	0.974966	PASS	TRUE	True Positives
Klebsiella_oxytoca	Z115_S81	in database	Klebsiella_oxytoca	794820	0.904052	0.974861	PASS	TRUE	True Positives
Klebsiella_pneumoniae	33495_S84	in database	Klebsiella_pneumoniae	2828108	0.833649	0.974825	PASS	TRUE	True Positives
Klebsiella_pneumoniae	49472_S85	in database	Klebsiella_pneumoniae	1680402	0.784809	0.975181	PASS	TRUE	True Positives
Klebsiella_pneumoniae	Z1380XA48_S83	in database	Klebsiella_pneumoniae	1091010	0.824303	0.974556	PASS	TRUE	True Positives
Klebsiella_variicola	31488_S86	in database	Klebsiella_variicola	3384622	0.905374	0.976756	PASS	TRUE	True Positives
Lactobacillus_acidophilus	4357_S179	in database	Lactobacillus_acidophilus	363136	0.979853	0.947438	PASS	TRUE	True Positives
Lactobacillus_crispatus	33820_S180	in database	Lactobacillus_crispatus	528564	0.979783	0.971851	PASS	TRUE	True Positives
Lactobacillus_gasseri	33323_S181	in database	Lactobacillus_gasseri	255076	0.960222	0.973888	PASS	TRUE	True Positives
Lacticaseibacillus_rhamnosus	8530_S182	in database	Lacticaseibacillus_rhamnosus	1456992	0.994166	0.950346	PASS	TRUE	True Positives
Lactobacillus_iners	55195DQ_S89	in database	Lactobacillus_iners	302264	0.993669	0.975046	PASS	TRUE	True Positives
Lactobacillus_iners	Z243_S88	in database	Lactobacillus_iners	345270	0.983131	0.973926	PASS	TRUE	True Positives
Lactobacillus_jensenii	25258_S90	in database	Lactobacillus_jensenii	339190	0.968271	0.977985	PASS	TRUE	True Positives
Listeria_monocytogenes	19115D-5_1	in database	Listeria_monocytogenes	495282	1	0.96148	PASS	TRUE	True Positives
Listeria_monocytogenes	19115D-5_2	in database	Listeria_monocytogenes	2351550	1	0.947881	PASS	TRUE	True Positives
Listeria_monocytogenes	7644_S92	in database	Listeria_monocytogenes	928954	1	0.959622	PASS	TRUE	True Positives
Limosilactobacillus_reuteri	53608_S91	in database	Limosilactobacillus_reuteri	1972750	1	0.949902	PASS	TRUE	True Positives
Lacticaseibacillus_rhamnosus	8530-655533_S304.species	in database	Lacticaseibacillus_rhamnosus	29488856	0.987962	0.944439	PASS	TRUE	True Positives
Mobiluncus_curtisii	51333_S95	in database	Mobiluncus_curtisii	1318496	0.52548	0.950405	PASS	TRUE	True Positives
Morganella_morganii	29884_S98	in database	Morganella_morganii	793146	1	0.933959	PASS	TRUE	True Positives
Morganella_morganii	8019_S100	in database	Morganella_morganii	1273980	1	0.96148	PASS	TRUE	True Positives
Morganella_morganii	subsp_sib	in database	Morganella_morganii	913888	1	0.935748	PASS	TRUE	True Positives
Mobiluncus_mulieris	93064_S96	in database	Mobiluncus_mulieris	103370	1	0.957182	PASS	TRUE	True Positives
Pseudomonas_aeruginosa	27853_S112	in database	Pseudomonas_aeruginosa	2287866	0.976337	0.97418	PASS	TRUE	True Positives
Pseudomonas_aeruginosa	39018_S111	in database	Pseudomonas_aeruginosa	1253742	0.977743	0.975671	PASS	TRUE	True Positives
Peptostreptococcus_anaerobius	27337_S175	in database	Peptostreptococcus_anaerobius	63536	0.958396	0.916178	PASS	TRUE	True Positives
Peptostreptococcus_anaerobius	4903D-5_S176	in database	Peptostreptococcus_anaerobius	1118898	0.964855	0.912851	PASS	TRUE	True Positives
Proteus_mirabilis	43071_S169	in database	Proteus_mirabilis	580298	0.992693	0.970429	PASS	TRUE	True Positives
Proteus_mirabilis	BAA-856_S168	in database	Proteus_mirabilis	720370	0.948307	0.969313	PASS	TRUE	True Positives
Proteus_mirabilis	35659_S110	in database	Proteus_mirabilis	48854	0.983239	0.976156	PASS	TRUE	True Positives
Proteus_mirabilis	7002_S108	in database	Proteus_mirabilis	41588	0.994607	0.976446	PASS	TRUE	True Positives
Proteus_mirabilis	Z050_S109	in database	Proteus_mirabilis	401586	0.998849	0.969679	PASS	TRUE	True Positives
Streptococcus_anginosus	33397_1	in database	Streptococcus_anginosus	1459844	0.627053	0.962899	PASS	TRUE	True Positives
Staphylococcus_aureus	27660_S121	in database	Staphylococcus_aureus	1192878	0.972414	0.968071	PASS	TRUE	True Positives
Staphylococcus_aureus	51740_S122	in database	Staphylococcus_aureus	355842	0.994382	0.965751	PASS	TRUE	True Positives
Salmonella_enterica	13076_S115	in database	Salmonella_enterica	299686	0.992922	0.973351	PASS	TRUE	True Positives
Salmonella_enterica	13312_S117	in database	Salmonella_enterica	181602	0.992122	0.974664	PASS	TRUE	True Positives
Staphylococcus_epidermidis	12228_S124	in database	Staphylococcus_epidermidis	318372	0.845883	0.968296	PASS	TRUE	True Positives
Staphylococcus_epidermidis	49134_S126	in database	Staphylococcus_epidermidis	1062112	1	0.962792	PASS	TRUE	True Positives
Staphylococcus_epidermidis	49461_S125	in database	Staphylococcus_epidermidis	21002	0.916133	0.975095	PASS	TRUE	True Positives
Staphylococcus_haemolyticus	29969_1	in database	Staphylococcus_haemolyticus	263072	0.961831	0.963391	PASS	TRUE	True Positives
Staphylococcus_haemolyticus	29970_S127	in database	Staphylococcus_haemolyticus	863032	0.964385	0.961479	PASS	TRUE	True Positives
Staphylococcus_lugdunensis	49576_S189	in database	Staphylococcus_lugdunensis	1119932	1	0.96753	PASS	TRUE	True Positives
Stenotrophomonas_maltophilia	700269_S134	in database	Stenotrophomonas_maltophilia	1294940	1	0.92097	PASS	TRUE	True Positives
Stenotrophomonas_maltophilia	BAA-84_S133	in database	Stenotrophomonas_maltophilia	1041494	0.98413	0.907107	PASS	TRUE	True Positives
Stenotrophomonas_maltophilia	BAA-85_S135	in database	Stenotrophomonas_maltophilia	1068370	0.985305	0.90571	PASS	TRUE	True Positives
Streptococcus_salivarius	13419_S150	in database	Streptococcus_salivarius	215228	0.992122	0.951888	PASS	TRUE	True Positives
Staphylococcus_saprophyticus	15305_S131	in database	Staphylococcus_saprophyticus	35596	0.994325	0.969548	PASS	TRUE	True Positives
Staphylococcus_saprophyticus	15305D-5_S132	in database	Staphylococcus_saprophyticus	1139232	0.994299	0.963695	PASS	TRUE	True Positives
Staphylococcus_saprophyticus	BAA750_S130	in database	Staphylococcus_saprophyticus	149924	0.986717	0.965931	PASS	TRUE	True Positives
Ureaplasma_urealyticum	27819_S191	in database	Ureaplasma_urealyticum	1776908	0.800045	0.97356	PASS	TRUE	True Positives
Ureaplasma_parvum	278152-655541_S312.species	in database	Ureaplasma_parvum	85570	0.924365	0.980736	PASS	TRUE	True Positives

## Sheet: Sup Table 2
Supp Table 2A
			Day 1			Day 2			Day 3				Inter-	Average CV%
Species: K. oxytoca ATCC# 700324		Rep 1	Rep 2	Rep 3	Rep 1	Rep 2	Rep 3	Rep 1	Rep 2	Rep 3	Average	Std Dev	assay CV%	Average Inter-assay
	3.0 x 10^6	0.899657	0.90864	0.910005	0.913665	0.916102	0.91828	0.915183	0.917365	0.919088	0.913109	0.00617184	0.675915	1.56955
	3.0 x 10^5	0.90588	0.909411	0.900238	0.915547	0.915763	0.909123	0.917311	0.91714	0.910566	0.91122	0.00579575	0.636043
	3.0 x 10^4	0.90098	0.90255	0.891001	0.90969	0.910976	0.898194	0.908004	0.910741	0.89674	0.903208	0.00710184	0.78629
	3.0 x 10^3	0.852977	0.861109	0.842853	0.849363	0.854469	0.820539	0.807908	0.811828	0.752058	0.828123	0.034615	4.17994
														Average Intra-assay
Intra-assay	CV%		2.68328			3.71377			6.49007					4.29571
Supp Table 2B
			Day 1			Day 2			Day 3				Inter-
Species: Lactobacillus gasseri ATCC# 33323	CFU/mL	Rep 1	Rep 2	Rep 3	Rep 1	Rep 2	Rep 3	Rep 1	Rep 2	Rep 3	Average	Std Dev	assay CV%	Average Inter-assay
	1640000	0.971844	0.969617	0.969986	0.971084	0.97134	0.970952	0.964223	0.964202	0.964307	0.968617	0.00334694	0.345538	1.60197
	164000	0.971859	0.971527	0.970209	0.969838	0.969945	0.9707	0.957752	0.96298	0.958325	0.967015	0.00572012	0.591523
	16400	0.967538	0.975839	0.970842	0.971654	0.96934	0.975788	0.954137	0.940788	0.929072	0.961666	0.0167055	1.73714
	1640	0.955953	0.921371	0.952291	0.962844	0.956054	0.941084	0.855567	0.898859	0.926573	0.930066	0.0347258	3.73369
	164													Average Intra-assay
Intra-assay	CV%		1.56\			0.98			3.55					2.03378
Supp Table 2C
			Day 1			Day 2			Day 3				Inter-
Species: Candida albicans ATCC# 14035	CFU/mL	Rep 1	Rep 2	Rep 3	Rep 1	Rep 2	Rep 3	Rep 1	Rep 2	Rep 3	Average	Std Dev	assay CV%	Average Inter-assay
	240000	0.991514	0.993117	0.993658	0.993325	0.993299	0.993445	0.948082	0.955101	0.949756	0.979033	0.0211286	2.15811	2.56348
	24000	0.992472	0.988511	0.991875	0.991658	0.992454	0.991692	0.935342	0.935139	0.943671	0.973646	0.0268328	2.75591
	2400	0.958894	0.989673	0.973078	0.976583	0.954187	0.953368	0.93532	0.917177	0.91225	0.952281	0.0264392	2.77641
	240			0.938345	0.851027	0.932973	0.936017	0.58563	0.72924	0.690388	0.809089	0.141612	17.5026	Average Intra-assay
Intra-assay	CV%		1.2			1.72			1.54					1.49367

## Sheet: Sup Table 3
	C. albicans (N=388)	C. glabrata (N=47)	C. parapsilosis (N=14)	E.coli (n=1292)	Any Klebsiella species(n=63)	Strep. agalactiae (GBS) (N=478)	Enterococcus faecalis (N=137)	Any Prevotella species (N=6425)	Any Gardnerella species (N=7158)	Mobiluncus species (N=439)	Megasphaera species (N=4331)
C. albicans	1	2% (1/47)	0	6% (83/1292)	0	8% (39/478)	0.7% (1/137)	6% (385/6425)	1	3% (14/439)	6.5% (283/4331)
C. glabrata	0.2% (1/388)	1	0	1.1% (14/1292)	2% (1/63)	0.2% (1/478)	0.7% (1/137)	0.7% (47/6425)	1	0.5% (2/439)	0.9% (37/4331)
C. parapsilosis	0	0	1	0.2% (3/1292)	0	0.6% (3/478)	0	0.2% (14/6425)	1	0.2% (1/439)	0.2% (10/4331)
E.coli	20% (79/388)	30% (14/47)	21% (3/14)	1	60% (38/63)	49% (233/478)	72% (99/137)	20% (1292/6425)	1	26% (116/439)	28% (1220/4331)
Klebsiella	0	2% (1/47)	0	4% (53/1292)	1	3% (14/478)	17% (24/137)	1% (63/6425)	1	0.7% (2/439)	1% (58/4331)
S. agal (GBS)	6% (23/388)	2% (1/47)		18% (233/1292)	22% (14/63)	1	18% (25/137)	7% (478/6425)	1	8% (37/439)	9% (408/4331)
E. faecalis	0.2% (1/388)	2% (1/47)	0	8% (99/1292)	38% (24/63)	5% (25/478)	1	2% (137/6425)	1	3% (14/439)	3% (123/4331)
Any Prevotella	99% (385/388)	1	1	1	1	1	1	1	1	1	1
Any Gardnerella	1	1	1	1	1	1	1	1	1	1	1
Mobiluncus species	3.6% (14/388)	4% (2/47)	7% (1/14)	9% (116/1292)	5% (3/63)	8% (37/478)	10% (14/137)	7% (439/6425)	1	1	10% (423/4331)
Megasphaera species	73% (283/388)	79% (37/47)	71% (10/14)	94% (1220/1292)	92% (58/63)	85% (408/478)	90% (123/137)	67% (4331/6425)	1	96% (423/439)	1
